# Supplementary material for: Crucial roles of triazinic-NO and CO groups in photocatalytic water splitting on graphitic carbon nitride
Source: Royal Society of Chemistry journal article supplement (doi:10.1039/d0ta09363g), 2021-01-01
Supplement: d0ta09363g1.zip [file d0ta09363g1.zip]

| Filename | Structure | Energy (eV) |
| --- | --- | --- |
| POSCAR_N_H2O | N…H2O | -490.28 eV |
| POSCAR_OH_NH | OH&N-H | -488.98 eV |
| POSCAR_NOH_NH | N-OH&N-H | -487.67 eV |
| POSCAR_NOH | N-OH | -483.86 eV |
| POSCAR_COH_NH | C-OH&N-H | -489.38 eV |
| POSCAR_COH | C-OH | -484.33 eV |
| POSCAR_NO_2NH | N=O&2N-H | -487.67 eV |
| POSCAR_NO_NH | N=O&N-H | -484.04 eV |
| POSCAR_NO | N=O | -480.28 eV |
| POSCAR_CO_2NH | C=O&2N-H | -489.23 eV |
| POSCAR_CO_NH | C=O&N-H | -484.76 eV |
| POSCAR_CO | C=O | -478.93 eV |
| POSCAR_CO_H2O | C=O&H2O | -493.76 eV |
| POSCAR_COOH_NH | C-OOH&N-H | -494.30 eV |
| POSCAR_COOH | C-OOH | -488.42 eV |
| POSCAR_HO2 | HO2 | -489.45 eV |
| POSCAR_H2O2 | H2O2 | -494.29 eV |
| POSCAR_O2_NH | O2&N-H | -489.03 eV |
| POSCAR_COH_H2O | C-OH&H2O | -499.09 eV |
| POSCAR_CO_H2O_NH | CO&H2O&N-H | -489.39 eV |
| POSCAR_CON | C-O-N | -479.16 eV |
| POSCAR_NO_H2O | N=O2+&H2O | -483.75 eV |
| POSCAR_NOOH_NH | N-OOH2+&N-H | -483.54 eV |
| POSCAR_OH_NH_1H2O | OH&N-H1.13&1H2Oa | -503.91 eV |
| POSCAR_OH_NH_2H2O | OH&N-H1.13&2H2Oa | -518.78 eV |
| POSCAR_OH_NH_2HF | OH&N-H1.13&2HF | -506.70 eV |
| POSCAR_OH_NH_2CH4 | OH&N-H1.13&2CH4 | -537.52 eV |
